# Supplementary material
Source: publisher figshare collection journal article supplement (https://acs.figshare.com/ndownloader/files/31693088)
Supplement: Supplementary file 1 [file 31693088]

# **Promotion Effect of the X-zeolite Host on Encapsulated Platinum Clusters for Selective Hydrogenation of Phenylacetylene to Styrene**

*Zhiyang Zhang<sup>1,2</sup>, Gui Liu<sup>3</sup>, Liping Ding<sup>3</sup>, Mi Hu<sup>1,2</sup>, Jing Gu<sup>4\*</sup>, Wenlong Xu<sup>1,2\*</sup> and Qingbo Xiao<sup>1,2\*</sup>*

<sup>1</sup>Institute of Agricultural Resources and Environment, Jiangsu Academy of Agricultural Sciences, Nanjing 210014, China.

<sup>2</sup>Key Laboratory of Agro-Environment in Downstream of Yangtze Plain, Ministry of Agriculture and Rural Affairs, Nanjing 210014, China.

<sup>3</sup>Key Lab of Mesoscopic Chemistry, School of Chemistry and Chemical Engineering, Nanjing University, Nanjing 210093, China.

<sup>4</sup>School of Chemistry and Chemical Engineering, Anhui University of Technology, No. 59 Hudong Road, Maanshan 243002, China.

\*Correspondence author. qbxiao@jaas.ac.cn; wlxu@jaas.ac.cn; gjing1320@163.com

**Table S1.** The Pt content (wt.%) in different samples.

| Samples      | Pt Content (wt.%, ICP-AES) |
|--------------|----------------------------|
| Pt@X-zeolite | 1.21                       |
| Pt/X-zeolite | 1.19                       |

**Table S2.** The Pt content (wt.%) in different samples after reaction of ten cycles.

| Samples      | Pt Content (wt.%, ICP-AES) |
|--------------|----------------------------|
| Pt@X-zeolite | 1.18                       |
| Pt/X-zeolite | 0.92                       |

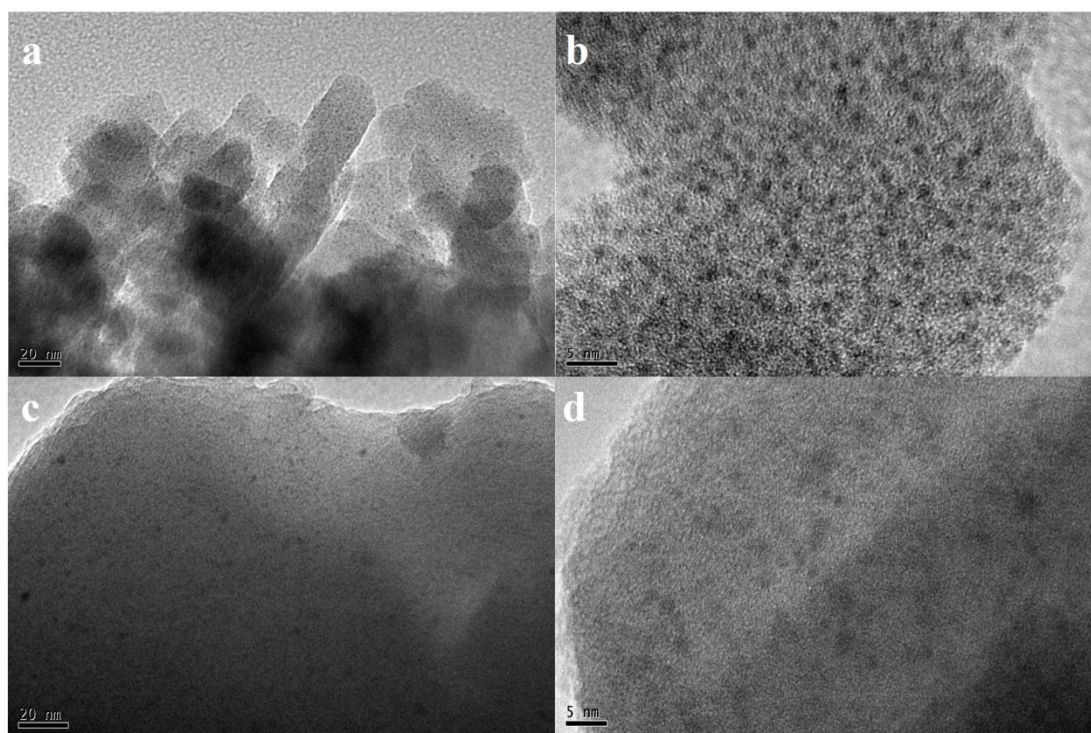

**Figure S1.** The HR-TEM images of (a) (b): Pt@X-zeolite and (c) (d): Pt/X-zeolite.

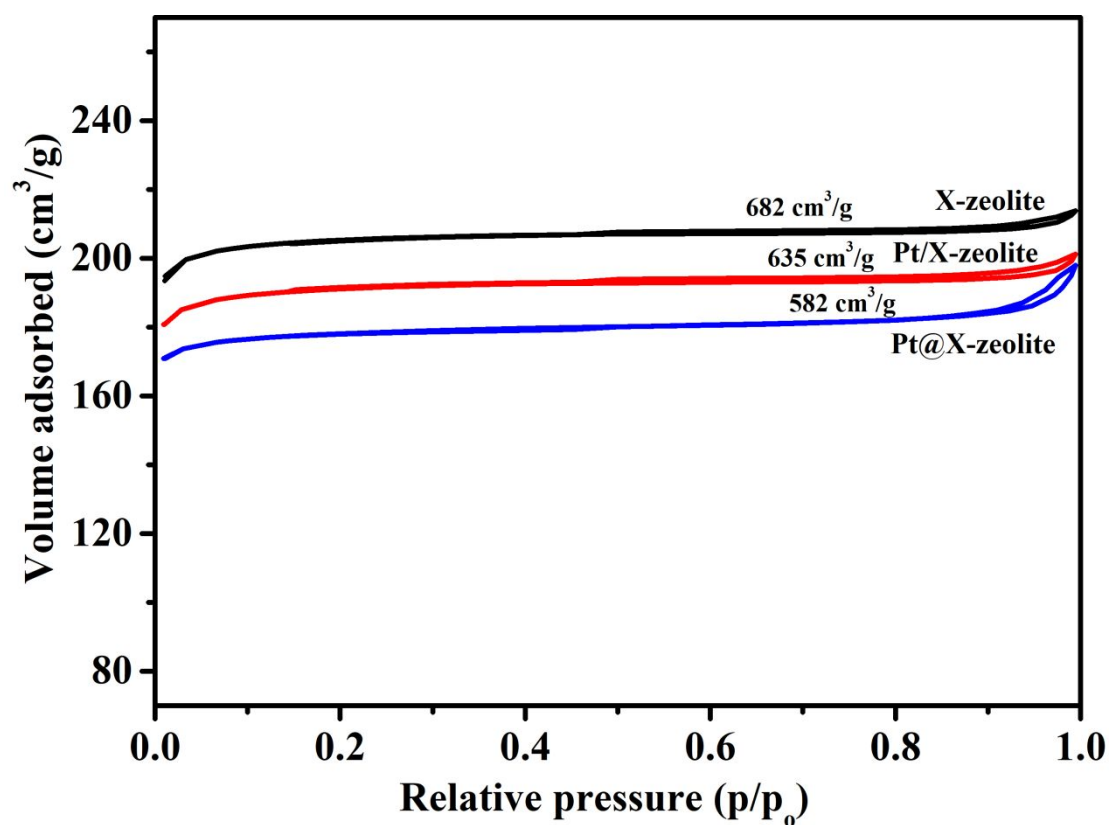

**Figure S2.** The N<sub>2</sub> adsorption/desorption isotherms of X-zeolite, Pt/X-zeolite and Pt@X-zeolite. (The N<sub>2</sub> adsorption/desorption isotherms of the three samples all display typical Langmuir-type curve (I-type) and their shapes are the same).

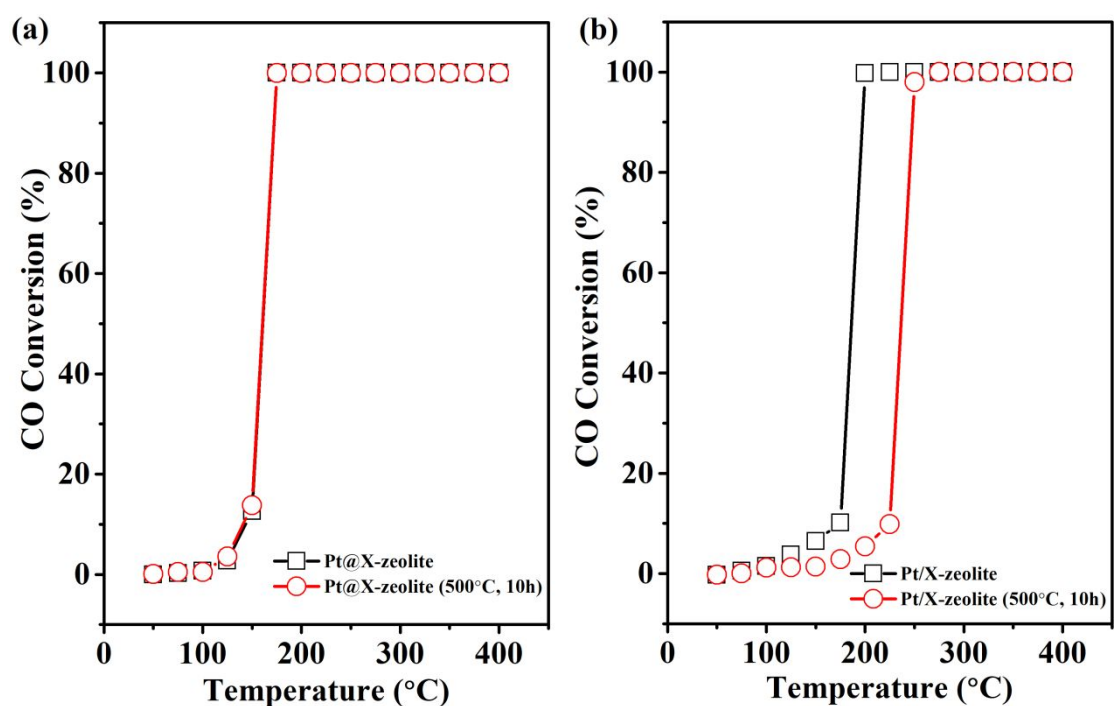

**Figure S3.** (a) The CO conversion over Pt@X-zeolite and (b) Pt/X-zeolite after the prolonged time

of 10 h reaction at 500°C.

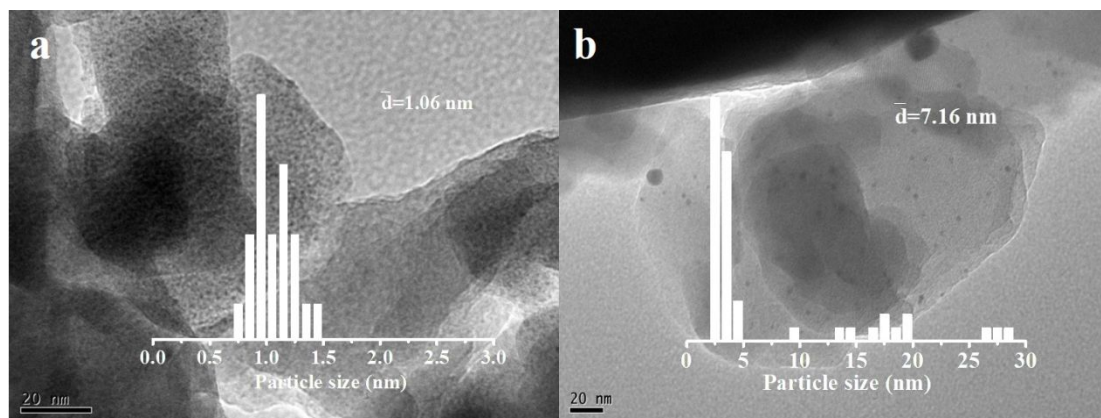

**Figure S4.** (a) The HR-TEM images for Pt@X-zeolite after the prolonged time of 10 h reaction at 500°C; (b) The HR-TEM images for Pt/X-zeolite after the prolonged time of 10 h reaction at 500°C. The size distribution of Pt clusters in the two samples is also inserted.

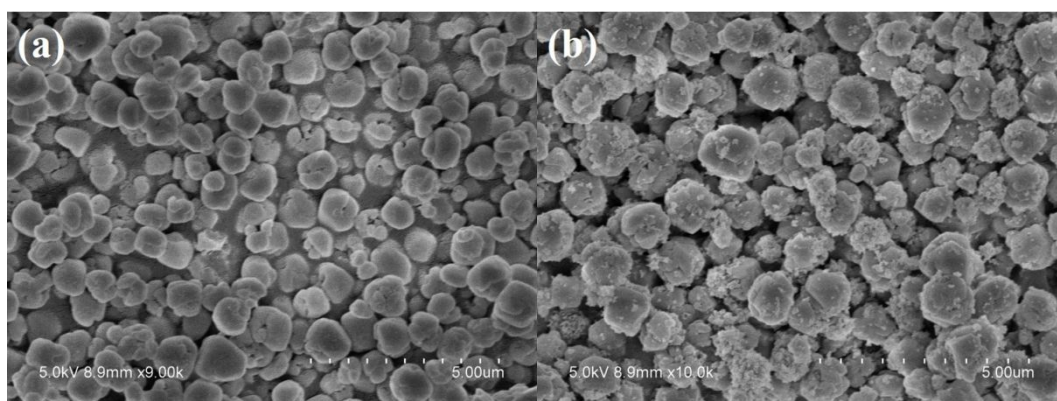

**Figure S5.** The SEM images of (a) Pt/X-zeolite and (b) Pt@X-zeolite samples.

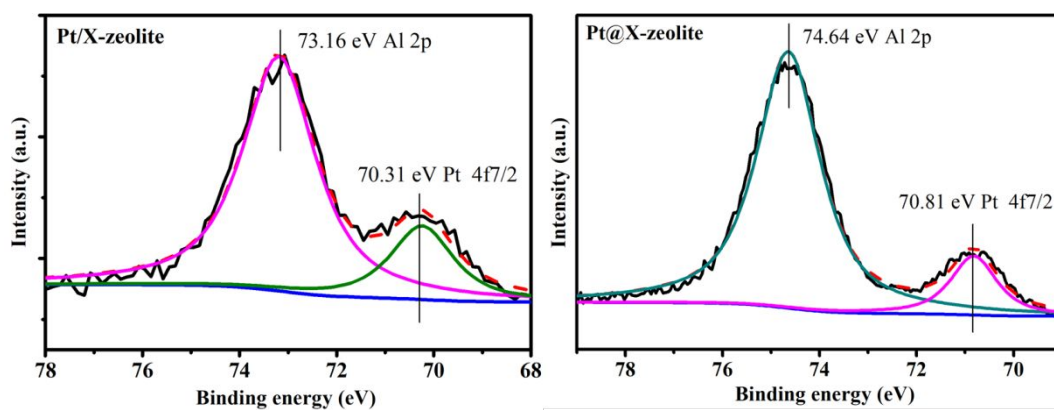

**Figure S6.** The Pt4f XPS results of Pt/X-zeolite and Pt@X-zeolite samples, the samples were reduced at 5.05 vol.% H<sub>2</sub>/N<sub>2</sub> at 350°C for 0.5 h before XPS test.

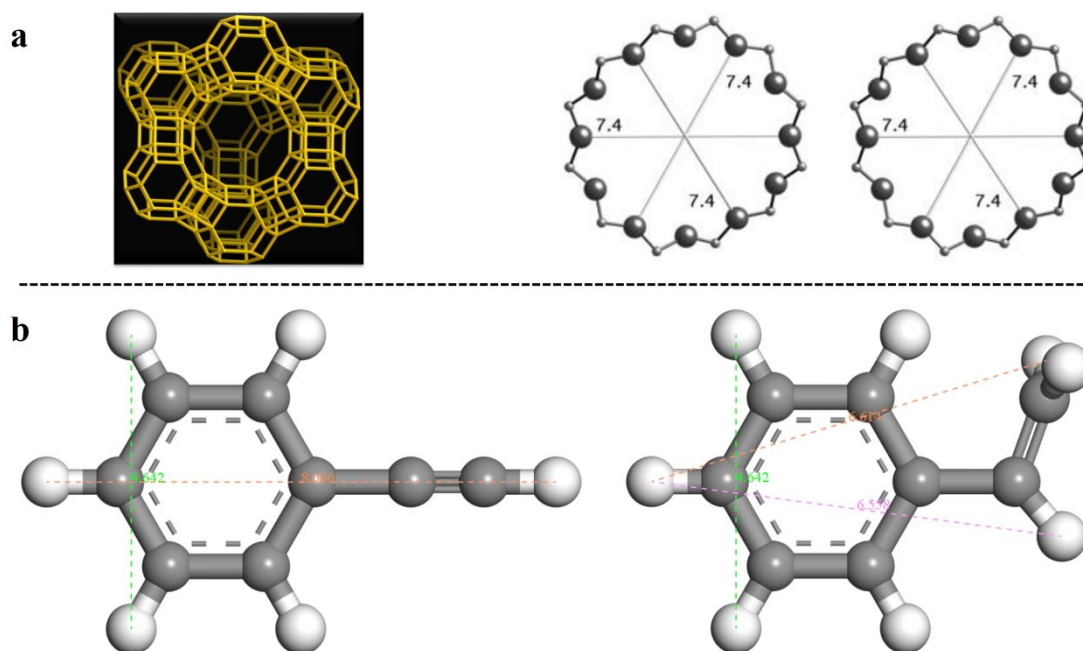

**Figure S7.** (a) The micro-model of X-zeolite and the size of 12-ring viewed along  $\langle 111 \rangle$ ; (b) the structure and size of phenylacetylene and styrene measured by materials studio.

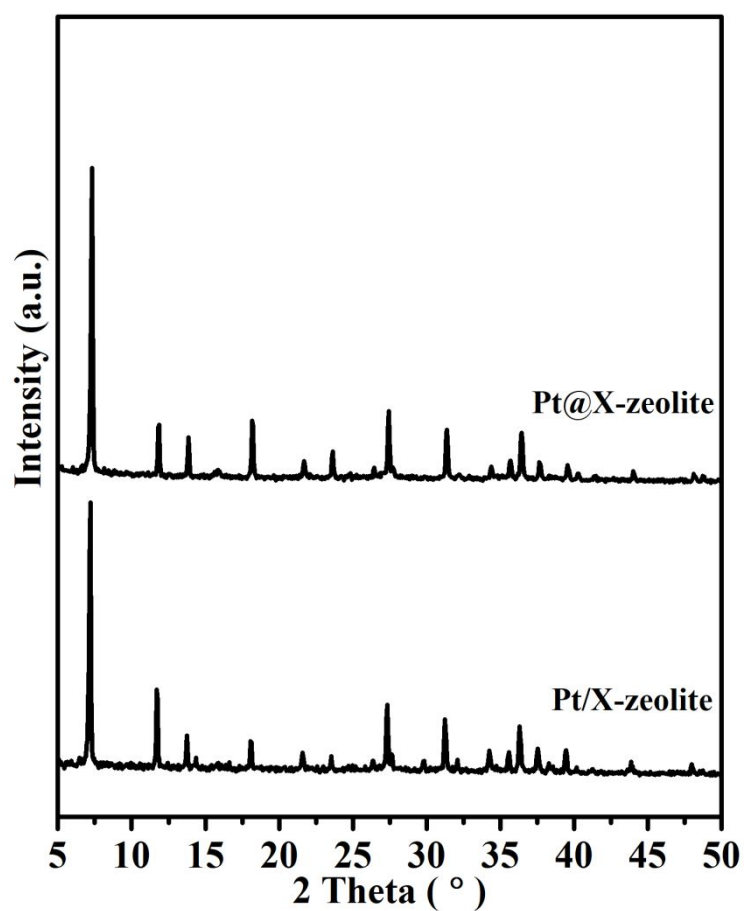

**Figure S8.** The X-ray diffraction spectra of Pt@X-zeolite and Pt/X-zeolite after reaction for ten cycles.
